# Supplementary material for: Plocabulin Displays Strong Cytotoxic Activity in a Personalized Colon Cancer Patient-Derived 3D Organoid Assay
Source: PubMed Central journal article supplement (PMC6891270; doi:10.3390/md17110648), 2019-11-19
Supplement: marinedrugs-17-00648-s001.pdf [file marinedrugs-17-00648-s001.pdf]

## Supplementary Materials:

# Plocabulin displays strong cytotoxic activity in a personalized colon cancer patient-derived 3D organoid assay

**Alba Costales-Carrera<sup>1,2</sup>, Asunción Fernández-Barral<sup>1,2</sup>, Pilar Bustamante-Madrid<sup>1,2</sup>, Laura Guerra<sup>3</sup>, Ramón Cantero<sup>3</sup>, Antonio Barbáchano<sup>1,2</sup> and Alberto Muñoz<sup>1,2</sup> \***

<sup>1</sup> Department of Cancer Biology, Instituto de Investigaciones Biomédicas “Alberto Sols” (CSIC-UAM) and University Hospital La Paz Institute for Health Research (IdiPAZ), Madrid, Spain; [amunoz@iib.uam.es](mailto:amunoz@iib.uam.es)

<sup>2</sup> Biomedical Research Networking Centres-Oncology (CIBERONC), Madrid, Spain; [abarbachano@iib.uam.es](mailto:abarbachano@iib.uam.es)

<sup>3</sup> General surgery and Pathology services University Hospital La Paz, Madrid, Spain; [laura.guerra@salud.madrid.org](mailto:laura.guerra@salud.madrid.org)

\* Correspondence: [amunoz@iib.uam.es](mailto:amunoz@iib.uam.es); Tel: +34-91-5854451

Figure S1

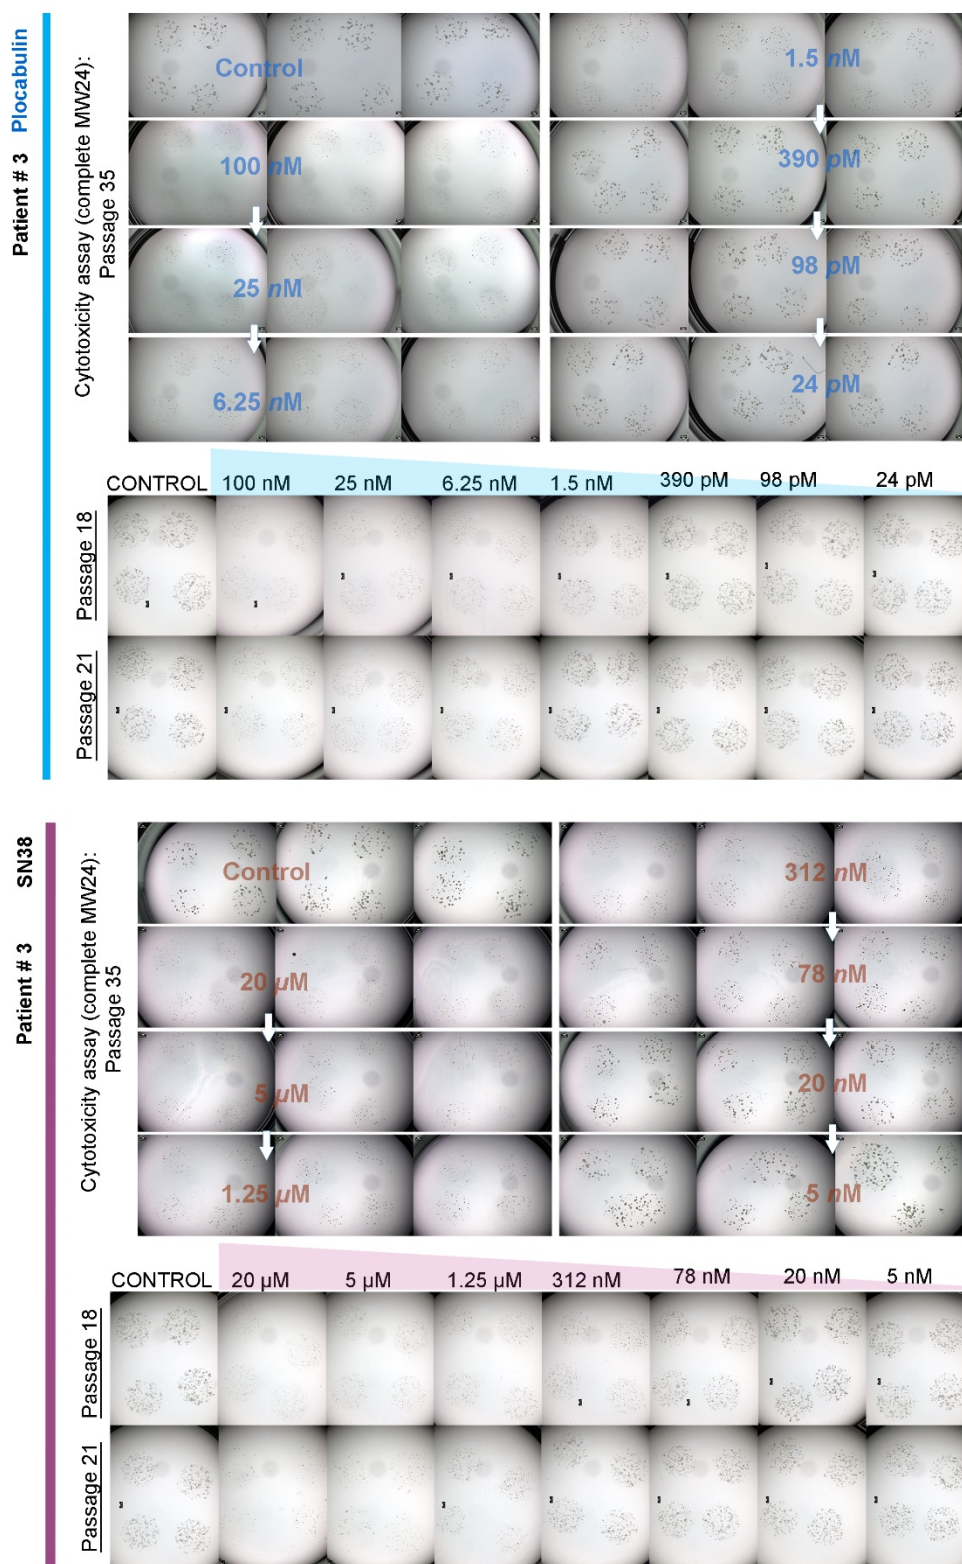

**Figure S1.** Plocabulin and SN38 action on patient #3 colon tumor organoid 3D culture. Images of assays on passage 35 are mounted resembling the design of a complete 24-well cytotoxicity assay (4-drop triplicates for each dose). For passage 18 and 21 assays, a single representative image per drug dose is shown. Microplate wells were photographed after 4 days of drug treatment using a Leica DFC550 digital camera mounted on a Leica S6D stereomicroscope.

Figure S2

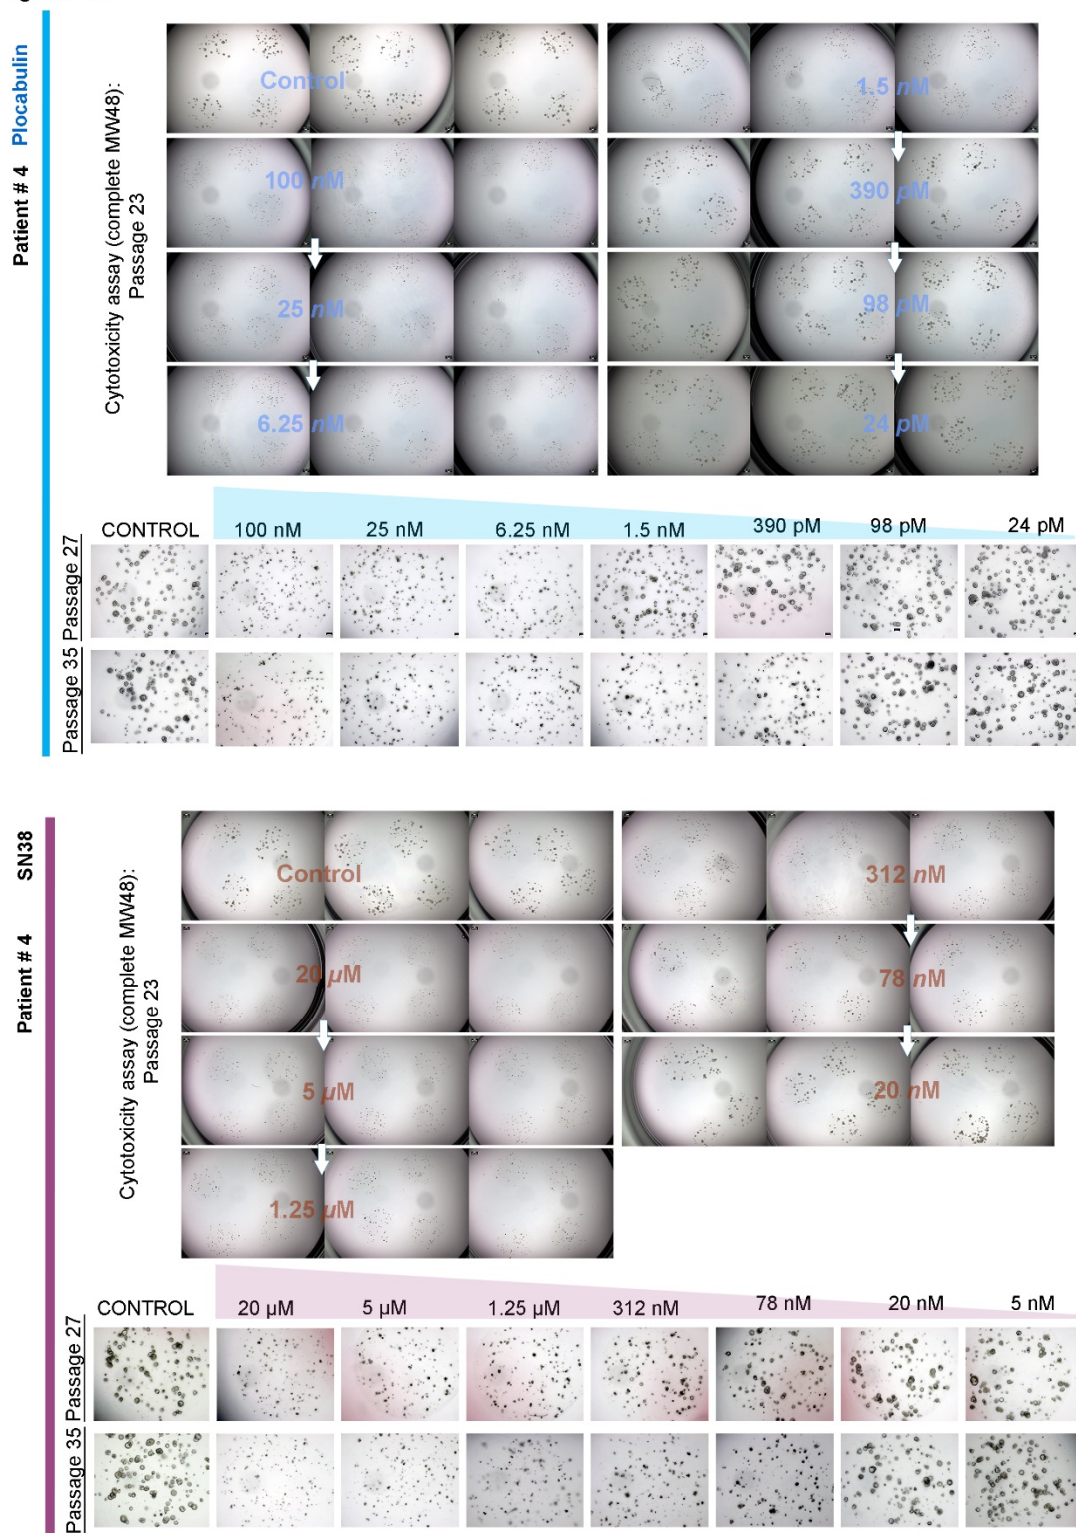

**Figure S2.** Plocabulin and SN38 action on patient #4 colon tumor organoid 3D culture. Images of assays on passage 23 are mounted resembling the design of a complete 24-well cytotoxicity assay (4-drop triplicates for each dose) and were taken with a Leica DFC550 digital camera mounted in a Leica S6D stereomicroscope. For passage 35 and 27 assays, a representative phase-contrast image of a single drop is shown for each drug dose; images were captured with a Leica DFC550 digital camera mounted on an inverted Nikon TS100 microscope. Microplate wells were photographed after 4 days of drug treatment.

Figure S3

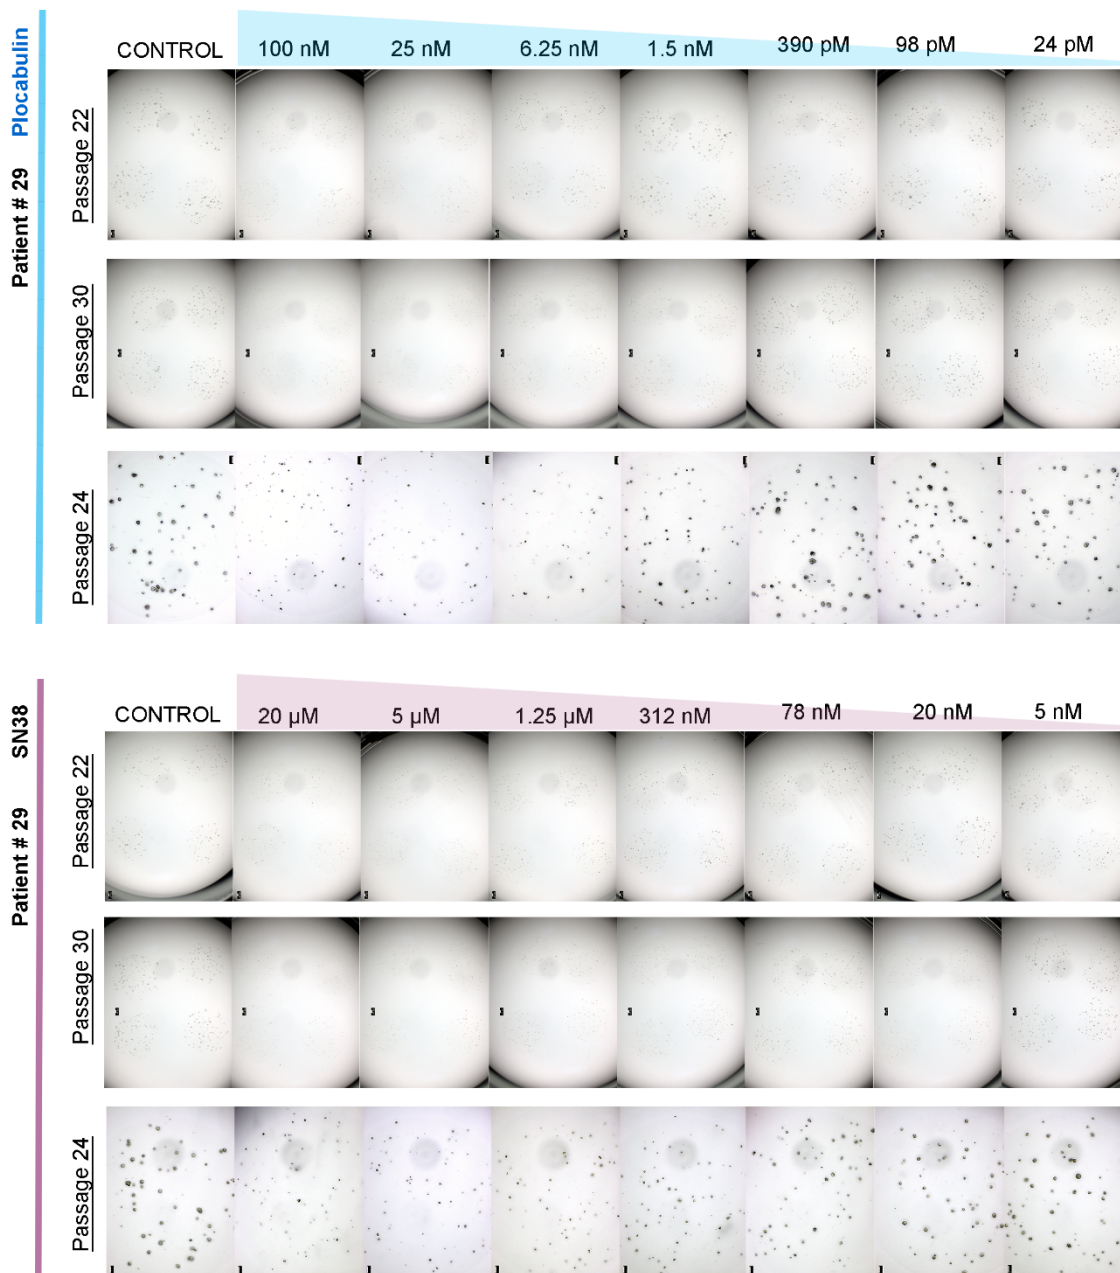

**Figure S3.** Plocabulin and SN38 action on patient #29 colon tumor organoid 3D culture. For passage 22 and 30 assays, a single representative images per drug dose (4 drops) is shown. Images were taken with a Leica DFC550 digital camera mounted in a Leica S6D stereomicroscope. For assays in passage 24, a phase-contrast image of a single drop is shown for each drug dose; images were captured with a Leica DFC550 digital camera mounted on an inverted Nikon TS100 microscope. Microplate wells were photographed after 4 days of drug treatment.

Figure S4

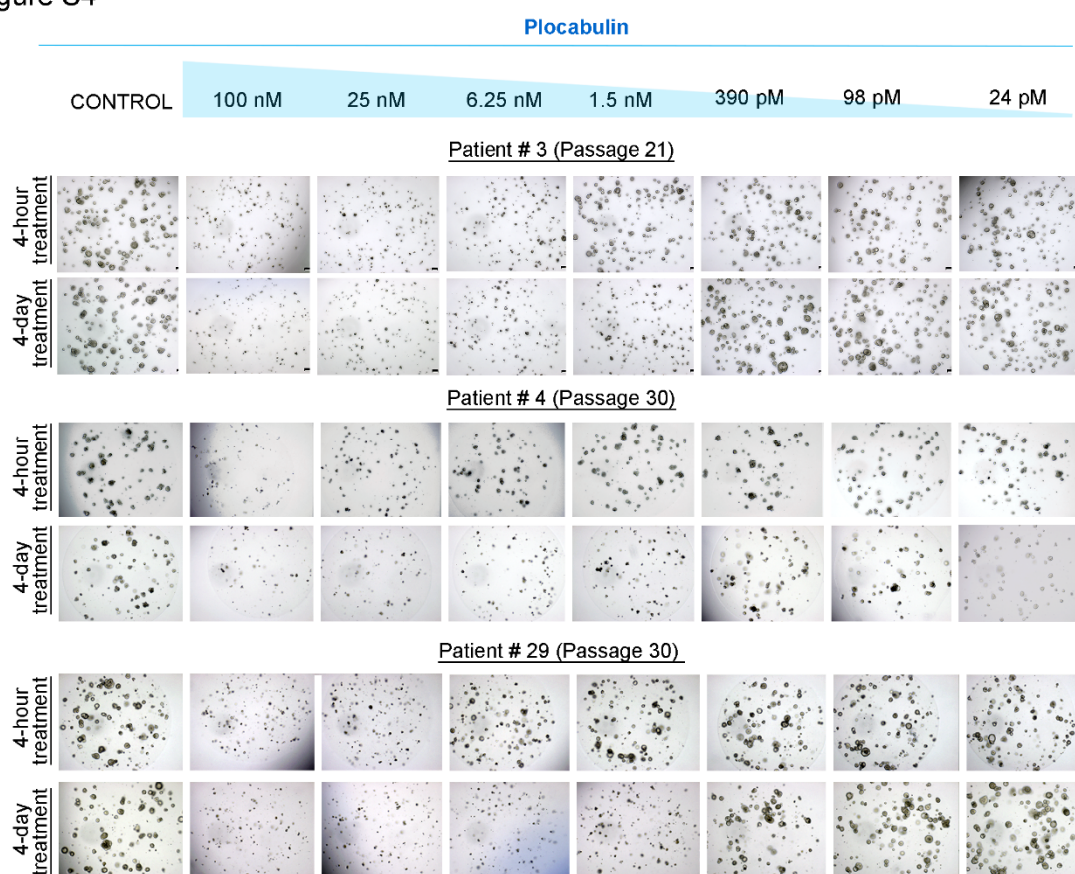

**Figure S4.** Plocabulin wash-out assays on patient #3, #4 and #29 colon tumor organoids. Organoids were treated with increasing doses of plocabulin that were either removed (and organoids washed) after 4 hours or left for 4 days until the end of the experiment.

**Table S1.** Quality control parameters of optimization and cytotoxicity assays. In optimization assays, the highest Z-score and the lowest error among control replicates are indicated in **bold**. For all cytotoxicity assays *Z-scores* > 0.5 (excellent).

| Organoid size (um)             | N° cells/well | Mean Dose Max  | Stdev Dose Max | Mean Control    | Stdev Control | Z' score    | Replicates Error (%) | Drug                    |
|--------------------------------|---------------|----------------|----------------|-----------------|---------------|-------------|----------------------|-------------------------|
| Patient # 3 Optimization assay |               |                |                |                 |               |             |                      |                         |
| 0-20                           | 500           | 413283         | 47125          | 1394000         | 248765        | 0.09        | 16.85                | Plocabulin              |
| 0-20                           | 1000          | 658148         | 69484          | 4474618         | 776624        | 0.33        | 9.68                 | Plocabulin              |
| 20-40                          | 125           | 1768308        | 350356         | 22015141        | 800499        | 0.83        | 8.87                 | Plocabulin              |
| <b>20-40</b>                   | <b>250</b>    | <b>2746802</b> | <b>298942</b>  | <b>24807637</b> | <b>971804</b> | <b>0.83</b> | <b>6.09</b>          | Plocabulin              |
| 40-70                          | 25            | 350656         | 40357          | 6200457         | 1947150       | -0.02       | 28.28                | Plocabulin              |
| 40-70                          | 50            | 870587         | 267613         | 16224438        | 2019466       | 0.55        | 14.03                | Plocabulin              |
| 40-70                          | 100           | 2105740        | 289822         | 22080887        | 2697896       | 0.55        | 9.31                 | Plocabulin              |
| 40-70                          | 200           | 2756345        | 597499         | 24105200        | 1070690       | 0.77        | 12.87                | Plocabulin              |
| Patient # 4 Optimization assay |               |                |                |                 |               |             |                      |                         |
| 0-20                           | 500           | 5154           | 2708           | 21285           | 12923         | -1.91       | 59.51                | Plocabulin              |
| 0-20                           | 1000          | 3844           | 2602           | 127006          | 58913         | -0.50       | 45.51                | Plocabulin              |
| 20-40                          | 125           | 29795          | 19670          | 501911          | 237200        | -0.63       | 35.98                | Plocabulin              |
| <b>20-40</b>                   | <b>250</b>    | <b>168246</b>  | <b>15972</b>   | <b>1896479</b>  | <b>83535</b>  | <b>0.83</b> | <b>9.23</b>          | Plocabulin              |
| 40-70                          | 25            | 229719         | 61523          | 4300094         | 859736        | 0.32        | 19.86                | Plocabulin              |
| 40-70                          | 50            | 57265          | 39804          | 1541867         | 708407        | -0.51       | 47.03                | Plocabulin              |
| 40-70                          | 100           | 202549         | 40242          | 4140153         | 1132057       | 0.11        | 21.20                | Plocabulin              |
| 40-70                          | 200           | 168592         | 56636          | 3178922         | 847947        | 0.10        | 26.24                | Plocabulin              |
| Patient # 3 Cytotoxic assays   |               |                |                |                 |               |             |                      |                         |
| 20-40                          | 250           | 215145         | 19580          | 44358481        | 2914011       | 0.80        | 6.57                 | SN38                    |
| 20-40                          | 250           | 625412         | 35629          | 52476972        | 1340186       | 0.92        | 2.55                 | SN38                    |
| 20-40                          | 250           | 974119         | 53102          | 42265760        | 1323605       | 0.90        | 3.13                 | SN38                    |
| 20-40                          | 250           | 618436         | 86867          | 35739738        | 1908494       | 0.83        | 5.34                 | Plocabulin              |
| 20-40                          | 250           | 262475         | 14650          | 27349327        | 1444995       | 0.84        | 5.28                 | Plocabulin              |
| 20-40                          | 250           | 1804668        | 90823          | 33778793        | 578087        | 0.94        | 1.71                 | Plocabulin              |
| 20-40                          | 250           | 1014079        | 151515         | 44830910        | 2623823       | 0.81        | 5.85                 | Plocabulin<br>(4-hours) |
| Patient # 4 Cytotoxic assays   |               |                |                |                 |               |             |                      |                         |
| 20-40                          | 250           | 1355139        | 176286         | 21247096        | 2813298       | 0.55        | 13.24                | SN38                    |
| 20-40                          | 250           | 640569         | 103270         | 7561784         | 920643        | 0.56        | 12.17                | SN38                    |
| 20-40                          | 250           | 1112398        | 53085          | 26658938        | 910771        | 0.89        | 3.42                 | SN38                    |
| 20-40                          | 250           | 772899         | 46941          | 35435702        | 2877947       | 0.75        | 8.12                 | Plocabulin              |
| 20-40                          | 250           | 372839         | 39144          | 4699088         | 230572        | 0.81        | 4.91                 | Plocabulin              |
| 20-40                          | 250           | 481200         | 68757          | 4480864         | 502943        | 0.57        | 11.22                | Plocabulin              |
| 20-40                          | 250           | 3801358        | 961696         | 58475645        | 6284173       | 0.60        | 10.75                | Plocabulin<br>(4-hours) |
| Patient # 29 Cytotoxic assays  |               |                |                |                 |               |             |                      |                         |

|       |     |         |        |          |         |      |       |                         |
|-------|-----|---------|--------|----------|---------|------|-------|-------------------------|
| 20-40 | 250 | 2096986 | 148234 | 31057958 | 298495  | 0.95 | 0.96  | SN38                    |
| 20-40 | 250 | 151329  | 15999  | 7538308  | 646543  | 0.73 | 8.58  | SN38                    |
| 20-40 | 250 | 219808  | 22178  | 6787216  | 355806  | 0.83 | 5.24  | SN38                    |
| 20-40 | 250 | 427430  | 2398   | 8178260  | 948348  | 0.63 | 11.60 | Plocabulin              |
| 20-40 | 250 | 15606   | 2393   | 8808391  | 225671  | 0.92 | 2.56  | Plocabulin              |
| 20-40 | 250 | 1305073 | 108784 | 31177552 | 1165901 | 0.87 | 3.74  | Plocabulin              |
| 20-40 | 250 | 458905  | 45358  | 30122351 | 2243235 | 0.77 | 7.45  | Plocabulin<br>(4-hours) |
